# Supplementary material for: Derivation of a prototype asthma attack risk scale centred on blood eosinophils and exhaled nitric oxide
Source: PubMed Central journal article supplement (PMC8762000; doi:10.1136/thoraxjnl-2021-217325), 2021-08-06
Supplement: thoraxjnl-2021-217325supp001.pdf [file thoraxjnl-2021-217325supp001.pdf]

# **Derivation of a prototype asthma attack risk scale centred on blood eosinophils and exhaled nitric oxide**

Simon Couillard, Annette Laugerud, Maisha Jabeen, Sanjay Ramakrishnan, James Melhorn,

Timothy SC Hinks, Ian D Pavord

**Online data supplement**

## Table of Contents

| <b>Content</b>                                                                                                            | <b>Page</b> |
|---------------------------------------------------------------------------------------------------------------------------|-------------|
| <b>Supplementary Table.</b> Biomarker-stratified randomised controlled trials analysed to derive the prototype risk scale | E3          |
| <b>Supplementary References</b>                                                                                           | E6          |

**SUPPLEMENTARY TABLE**  
**Biomarker-stratified randomised controlled trials analysed to derive the prototype risk scale**

| <b>Trial name (registration number)[Ref#]<br/>Study design</b>                                                                                     | <b>Arm included<br/>(n / total N)</b>                                                            | <b>Key Inclusion criteria</b>                                                                                                                                                                                                                                                     | <b>GINA Step:<br/>No (%)</b>              | <b>ACQ mean score</b>                              | <b>FEV1 % predicted</b>                     | <b>PostBD change in FEV1 (%)</b>            | <b>Blood Eos (x10<sup>9</sup>/L)</b>              | <b>FeNO (ppb)</b>                                            |
|----------------------------------------------------------------------------------------------------------------------------------------------------|--------------------------------------------------------------------------------------------------|-----------------------------------------------------------------------------------------------------------------------------------------------------------------------------------------------------------------------------------------------------------------------------------|-------------------------------------------|----------------------------------------------------|---------------------------------------------|---------------------------------------------|---------------------------------------------------|--------------------------------------------------------------|
| Novel START<br>(ACTRN12615000999538)[1]<br>52-week, randomised, open-label, parallel-group, controlled trial                                       | Salbutamol as needed<br>(223/668)                                                                | SABA monotherapy in previous 3 months; SABA use on at least 2 occasions and an average of ≤2 occasions per day in the previous 4 weeks; no minimum requirement for SABA use in those with severe exacerbation in last 12 months                                                   | Step 1:<br>219<br>(100)                   | 1.1 (0.7)                                          | 89 (14)                                     | nd                                          | 0.3 (0.2)                                         | 40<br>(5-235)*                                               |
| CAPTAIN<br>(NCT02924688)[2]<br>52-week, phase IIIA, randomised, double-blind, active-controlled, parallel-group double versus triple inhaler trial | Fluticasone furoate/<br>vilanterol 100/25<br>mcg, with or without<br>umeclidinium<br>(1218/2439) | ACQ≥1.5 despite maintenance therapy with medium-to-high-dose daily ICS plus LABA;; FEV1 ≥30–<85% of predicted and postBD FEV1 reversibility (≥12% and 200 ml); acute asthma symptoms requiring healthcare contact/change in therapy in last 12 months                             | Step 4:<br>1097<br>(100)                  | 2.5 (0.6)                                          | 58 (13)                                     | 30 (18)                                     | 0.23<br>(0.91)†                                   | 20.0<br>(0.7)†                                               |
| Benralizumab 2b trial<br>(NCT01238861) [3]<br>52-week, randomized, controlled, double-blind, dose-ranging, Phase IIb clinical trial                | Placebo<br>+Maintenance<br>therapy with<br>moderate to high dose<br>ICS and LABA<br>(222/606)    | medium-high dose ICS/LABA ≥1 year; prebronchodilator FEV1 ≥40% and <90% predicted; ACQ-6 score ≥1.5 on ≥2 occasions during screening; postbronchodilator FEV1 reversibility (≥12% and 200 ml) or a positive response to a methacholine challenge; 2-6 exacerbations in prior year | Step 4:<br>122 (55)<br>Step 5<br>100 (45) | Eos<br>High:<br>2.7 (1.0)<br>Eos Low:<br>2.5 (0.8) | Eos High:<br>65 (15)<br>Eos Low:<br>69 (15) | Eos High:<br>18 (15)<br>Eos Low:<br>13 (13) | Eos High:<br>0.53 (30)<br>Eos Low:<br>0.16 (0.09) | Eos<br>High:<br>37.9<br>(31.9)<br>Eos Low:<br>20.7<br>(13.9) |

(supplementary table continues next page)

## ... supplementary table

| ...Name                                                                                                                                     | ... Arm (n/N)                                                                     | ...Inclusion criteria                                                                                                                                                                                                                                                                                                   | ...GINA Step                                                    | ...ACQ    | ...FEV1 % predicted | ... PostBD change% | ... Eos        | ... FeNO       |
|---------------------------------------------------------------------------------------------------------------------------------------------|-----------------------------------------------------------------------------------|-------------------------------------------------------------------------------------------------------------------------------------------------------------------------------------------------------------------------------------------------------------------------------------------------------------------------|-----------------------------------------------------------------|-----------|---------------------|--------------------|----------------|----------------|
| PATHWAY (NCT02054130) [4]<br>52-week, randomized, double-blind, placebo-controlled, Phase II clinical trial                                 | Placebo + Maintenance therapy with a moderate to high dose ICS and LABA (138/550) | ACQ-6 score $\geq 1.5$ despite medium-to-high dose ICS and LABA for $\geq 6$ months; prebronchodilator FEV1 $\geq 40\%$ and $< 80\%$ predicted; postbronchodilator FEV1 reversibility ( $\geq 12\%$ and 200 ml); $\geq 2$ exacerbations or $\geq 1$ severe exacerbation resulting in hospitalization in the prior year; | Step 4:<br>73 (53)<br>Step 5:<br>65 (47)                        | 2.7 (0.7) | 60 (14)             | nd                 | 0.38<br>(0.33) | 37.8<br>(39.7) |
| STRATOS 1 (NCT02161757) [5]<br>52-week, randomized, double-blind, parallel-group, placebo-controlled, tralokinumab phase III clinical trial | Placebo +Maintenance therapy with moderate to high dose ICS and LABA (400/798)    | Medium/high dose ICS+LABA $\geq 3$ months; $\geq 2$ exacerbations in prior year; prebronchodilator FEV1 $< 80\%$ Predicted ( $< 90\%$ if aged 12-17); ACQ-6 score $\geq 1.5$ ; postbronchodilator FEV1 reversibility ( $\geq 12\%$ and 200 ml)                                                                          | Step 3:<br>3 (1)<br>Step 4:<br>194 (49)<br>Step 5:<br>203 (51)  | 2.6 (0.9) | 62 (13)             | 23 (24)            | 0.25<br>(0.20) | 29.6<br>(28.2) |
| STRATOS 2 (NCT02194699) [5]<br>52-week, randomized, double-blind, parallel group, placebo-controlled, tralokinumab phase III clinical trial | Placebo +Maintenance therapy with moderate to high dose ICS and LABA (422/837)    | Medium/high dose ICS+LABA $\geq 3$ months; $\geq 2$ exacerbations in prior year; prebronchodilator FEV1 $< 80\%$ Predicted ( $< 90\%$ if aged 12-17); ACQ-6 score $\geq 1.5$ ; postbronchodilator FEV1 reversibility ( $\geq 12\%$ and 200 ml)                                                                          | Step 3:<br>14 (3)<br>Step 4:<br>196 (47)<br>Step 5:<br>207 (50) | 2.6 (0.9) | 61 (15)             | 26 (25)            | 0.27<br>(0.23) | 31.7<br>(27.2) |

(supplementary table continues next page)

## ... supplementary table

| ...Name                                                                                                             | ... Arm (n/N)                                                                                                               | ...Inclusion criteria                                                                                                                                                                                                                                                                                                                                                                               | ...GINA Step                               | ...ACQ                        | ...FEV1 % predicted       | ... PostBD change%        | ... Eos                                 | ... FeNO                                |
|---------------------------------------------------------------------------------------------------------------------|-----------------------------------------------------------------------------------------------------------------------------|-----------------------------------------------------------------------------------------------------------------------------------------------------------------------------------------------------------------------------------------------------------------------------------------------------------------------------------------------------------------------------------------------------|--------------------------------------------|-------------------------------|---------------------------|---------------------------|-----------------------------------------|-----------------------------------------|
| LIBERTY ASTHMA QUEST (NCT02414854)[6]<br>52-week randomised, double-blind, placebo-controlled, parallel-group trial | Placebo (1.14 mL and 2 mL)<br>+Maintenance therapy with moderate to high dose ICS and ≤ 2 additional controllers (634/1902) | ACQ-5≥ 1.5 despite receiving medium-to-high-dose ICS plus up to two additional controllers; preBD FEV1 ≤80%; postBD FEV1 reversibility (≥12% and 200 ml); hospital presentation or treatment with systemic corticosteroids in last 12 months                                                                                                                                                        | Step 4:<br>293 (49)<br>Step 5:<br>327 (51) | 2.7 (0.7)<br>and<br>2.8 (0.8) | 58 (13)<br>and<br>58 (14) | 25 (19)<br>and<br>26 (18) | 0.37<br>(0.34)<br>and<br>0.39<br>(0.42) | 34.5<br>(28.5)<br>and<br>38.4<br>(38.0) |
| DREAM (NCT01000506)[7]<br>52-week, multicentre, randomised, double-blind, placebo-controlled mepolizumab trial      | Placebo<br>+Maintenance therapy with high-dose ICS and LABA (155/616)                                                       | ACQ≥1.5 or prebronchodilator FEV1<80% predicted despite high-dose ICS and LABA for ≥12 months; postBD FEV1 reversibility (≥12% and 200 ml) or positive response to methacholine challenge; characteristic eosinophilic airway inflammation in previous year (≥1 of : sputum eosinophils >3%, peripheral blood eosinophils ≥0.3×10 <sup>9</sup> /L, FeNO>50ppb); ≥2 exacerbations in the prior year; | Step 5:<br>151<br>(100)                    | 2.5 (1.1)                     | 59 (15)                   | 21 (nd)                   | 0.28<br>(1.01)††                        | 33.7<br>(0.8)††                         |

Data are mean (SD) unless otherwise indicated; \*median (range); † geometric mean (SD of log); †† geometric mean on log<sub>e</sub> scale (SD). ACQ, asthma control questionnaire; Blood Eos, peripheral blood eosinophil count (×10<sup>9</sup> cells/L); FeNO, fractional exhaled nitric oxide (ppb); FEV1, forced expiratory volume in 1 second; ICS, inhaled corticosteroid; LABA, long-acting beta2-agonist; n, number of patients in the control arm; N, overall number of patients enrolled in trial; nd, not disclosed; BD, bronchodilator

### Supplementary References

- 1 Beasley R, Holliday M, Reddel HK, *et al.* Controlled trial of budesonide-formoterol as needed for mild asthma. *N Engl J Med* 2019;**380**:2020–30. doi:10.1056/NEJMoa1901963
- 2 Lee LA, Bailes Z, Barnes N, *et al.* Efficacy and safety of once-daily single-inhaler triple therapy (FF/UMEC/VI) versus FF/VI in patients with inadequately controlled asthma (CAPTAIN): a double-blind, randomised, phase 3A trial. *Lancet Respir Med* 2021;**9**:69–84. doi:10.1016/S2213-2600(20)30389-1
- 3 Castro M, Wenzel SE, Bleeker ER, *et al.* Benralizumab, an anti-interleukin 5 receptor  $\alpha$  monoclonal antibody, versus placebo for uncontrolled eosinophilic asthma: A phase 2b randomised dose-ranging study. *Lancet Respir Med* 2014;**2**:879–90. doi:10.1016/S2213-2600(14)70201-2
- 4 Corren J, Parnes JR, Wang L, *et al.* Tezepelumab in Adults with Uncontrolled Asthma. *N Engl J Med* 2017;**377**:936–46. doi:10.1056/NEJMoa1704064
- 5 Panettieri RA, Sjöbring U, Péterffy AM, *et al.* Tralokinumab for severe, uncontrolled asthma (STRATOS 1 and STRATOS 2): two randomised, double-blind, placebo-controlled, phase 3 clinical trials. *Lancet Respir Med* 2018;**6**:511–25. doi:10.1016/S2213-2600(18)30184-X
- 6 Castro M, Corren J, Pavord ID, *et al.* Dupilumab Efficacy and Safety in Moderate-to-Severe Uncontrolled Asthma. *N Engl J Med* 2018;**378**:2486–96. doi:10.1056/NEJMoa1804092
- 7 Pavord ID, Korn S, Howarth P, *et al.* Mepolizumab for severe eosinophilic asthma (DREAM): A multicentre, double-blind, placebo-controlled trial. *Lancet* 2012;**380**:651–9. doi:10.1016/S0140-6736(12)60988-X
